# Supplementary material
Source: PubMed Central journal article supplement (PMC5555192)
Supplement: 10.1074_M117.787572_jbc.M117.787572-1.pdf [file 10.1074_M117.787572_jbc.M117.787572-1.pdf]

## Supplemental Figure Legends

**Figure S1.** Detailed structural comparison of the post-SET from the autoinhibited *ctPRC2* (*top*) with the stimulated state structures (*bottom*, PDB ID: 5KKL). Residues are labeled in gold (*post-SET*) or magenta (*H3 peptide*).

**Figure S2.** Crystal packing of autoinhibited *ctPRC2*, with proteins color-coded. The post-SET sub-domain (*dark blue cartoon marked by the black arrow*) of *ctEzh2* is not involved in crystal packing and is located far away from *ctPRC2* symmetry mates (*gray ribbons*).

**Figure S3.** Structural alignment of Ezh2 SET domains from *ctPRC2* stimulated (*gray*, PDB ID: 5KKL) and autoinhibited (*blue*) states. Dashed, black lines indicate un-modeled regions. Several residues within amino acids 848-855 of the SET-I are shown as sticks to indicate conformational changes between the two states.

**Figure S4.** The post-SET region (*gold*) is stabilized by an extensive network of direct and water-mediated hydrogen bonds with the SET-I region (*cyan*) in the autoinhibited state. Important residues are shown as sticks, waters are depicted as red spheres, and black, dotted lines indicate hydrogen bonds.

**Figure S5.** Detailed comparison of the SAM binding site between the *ctPRC2* SAM-bound and stimulated (PDB ID: 5KKL) structures. Hydrogen bonds are indicated by black, dashed lines. The side-chain of C807 is omitted for clarity. The post-SET region of the SAM-bound structure is not shown because it does not participated in SAM binding.

**Figure S6.** SDS-PAGE analysis of proteins used in biochemical assays. A) Proteins from Fig. 2B. B) Proteins from SAL mutational analysis, Fig. 2D. C) Proteins from autoinhibition mutational analysis, Fig. 3A. D) Proteins used for kinetic analysis, Figs. 3D and 3E, and for crystallization.

**Figure S7.** B-factor analysis of autoinhibited wildtype *ctPRC2* (*top*) and E840A\_K852D mutant (*bottom*). B-factors are heat-colored from dark-blue (*relative lowest*) to red (*relative highest*). The view is the same as **Fig. 4**.

**Figure S8.** Sequence alignment of human (*h*) and *ctEzh2*. The SET-I (*cyan*)

and post-SET (*gold*) subdomains are indicated by dashed boxes. Purple stars indicate aromatic cage residues of the active site. Red hexagons indicate residues important for autoinhibition in *ctPRC2*.

**Figure S9.** Structural alignment of the autoinhibited SET domains of *ctEzh2* and *hEzh2*. **(A)** Comparison with an isolated *hEzh2*(SET) (PDB ID: 4MI5). For simplicity, only the post-SET (*gold in ctEzh2* and *blue in human*) and SET-I (*green in human*) are color-coded. Black, dashed lines indicate hydrogen bonds. Placement of the histone H3K27M peptide (*magenta*) is based on alignment with the substrate bound human structure (PDB ID: 5HYN). Hydrogen bonds are indicated by black, dashed lines. **(B)** Comparison with *hEzh2*(SET) in an active autoinhibited *hPRC2* (*light gray*, PDB ID: 5IJ7). Formatting and color-coding is the same as for **(A)**.

Fig. S1

Bratkowski et al.

post-SET

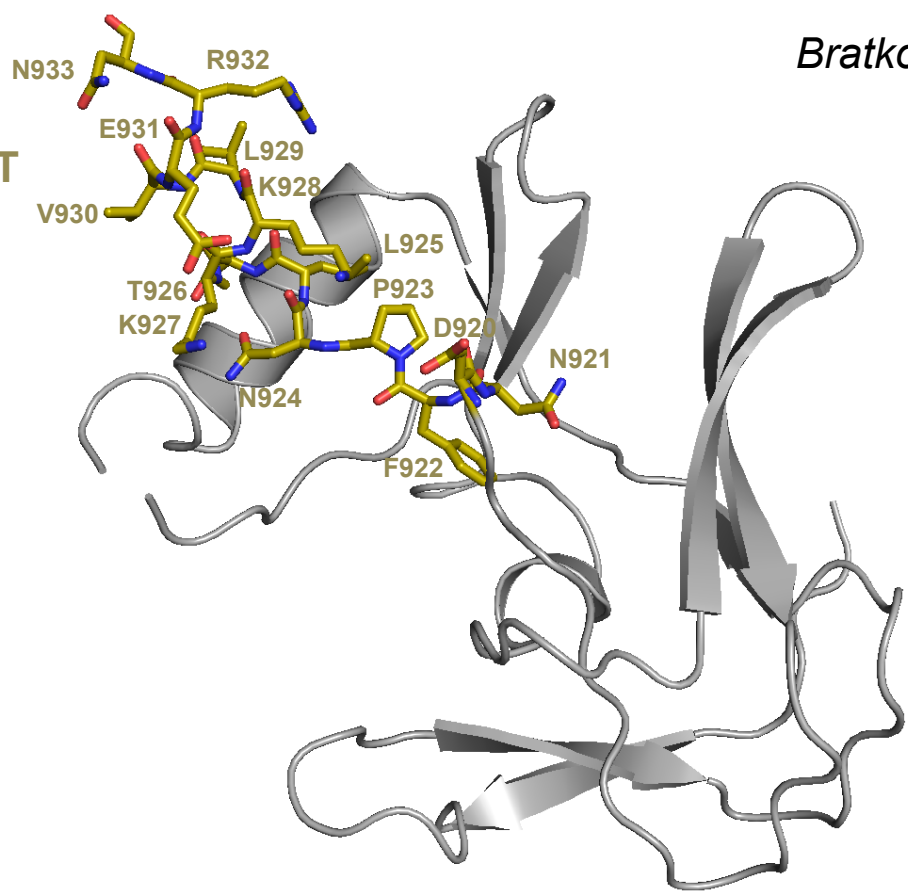

post-SET  
H3 Peptide

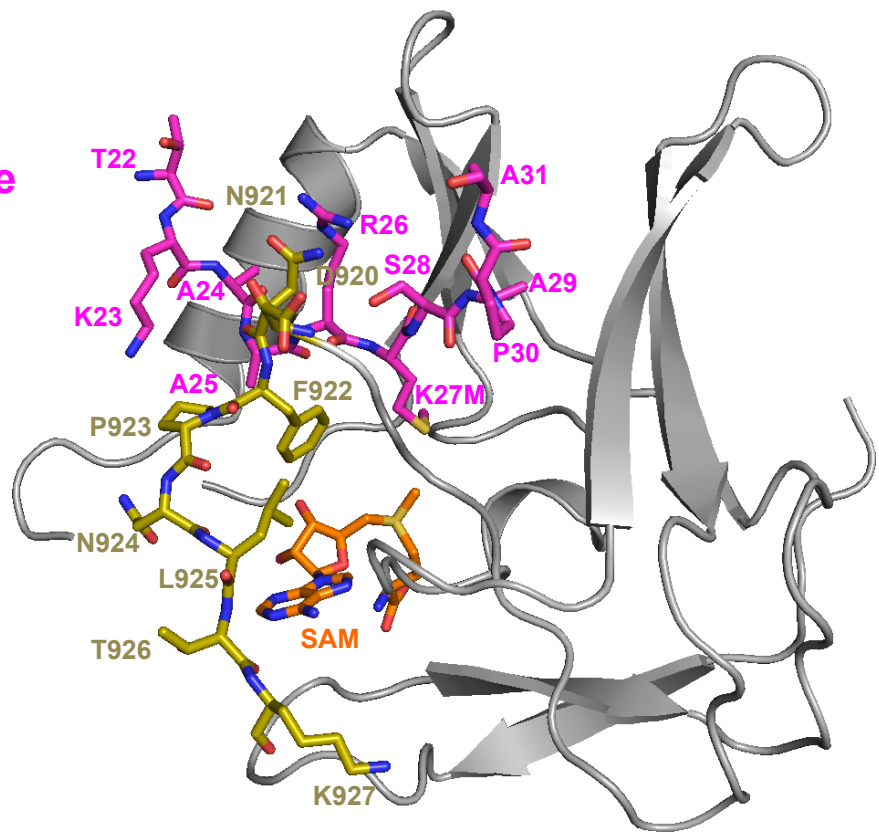

**Fig. S2**

*Bratkowski et al.*

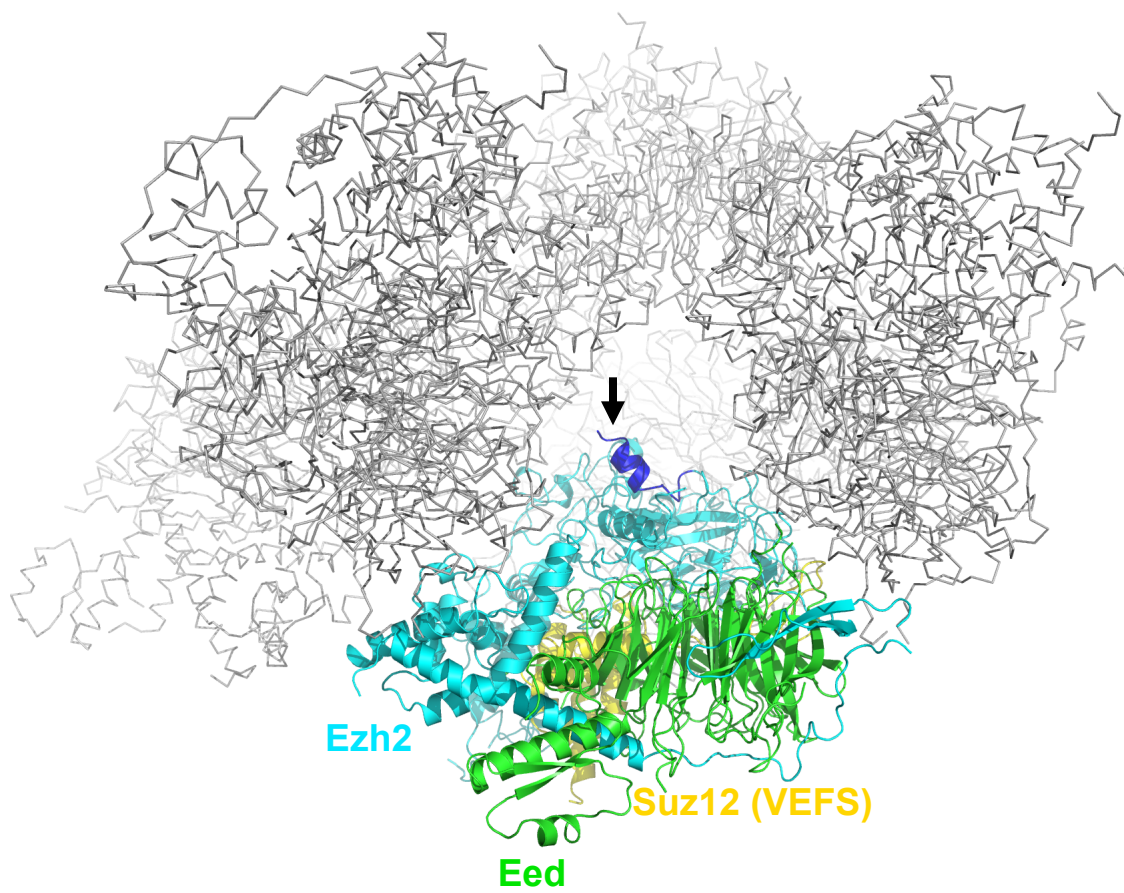

**Fig. S3**

*Bratkowski et al.*

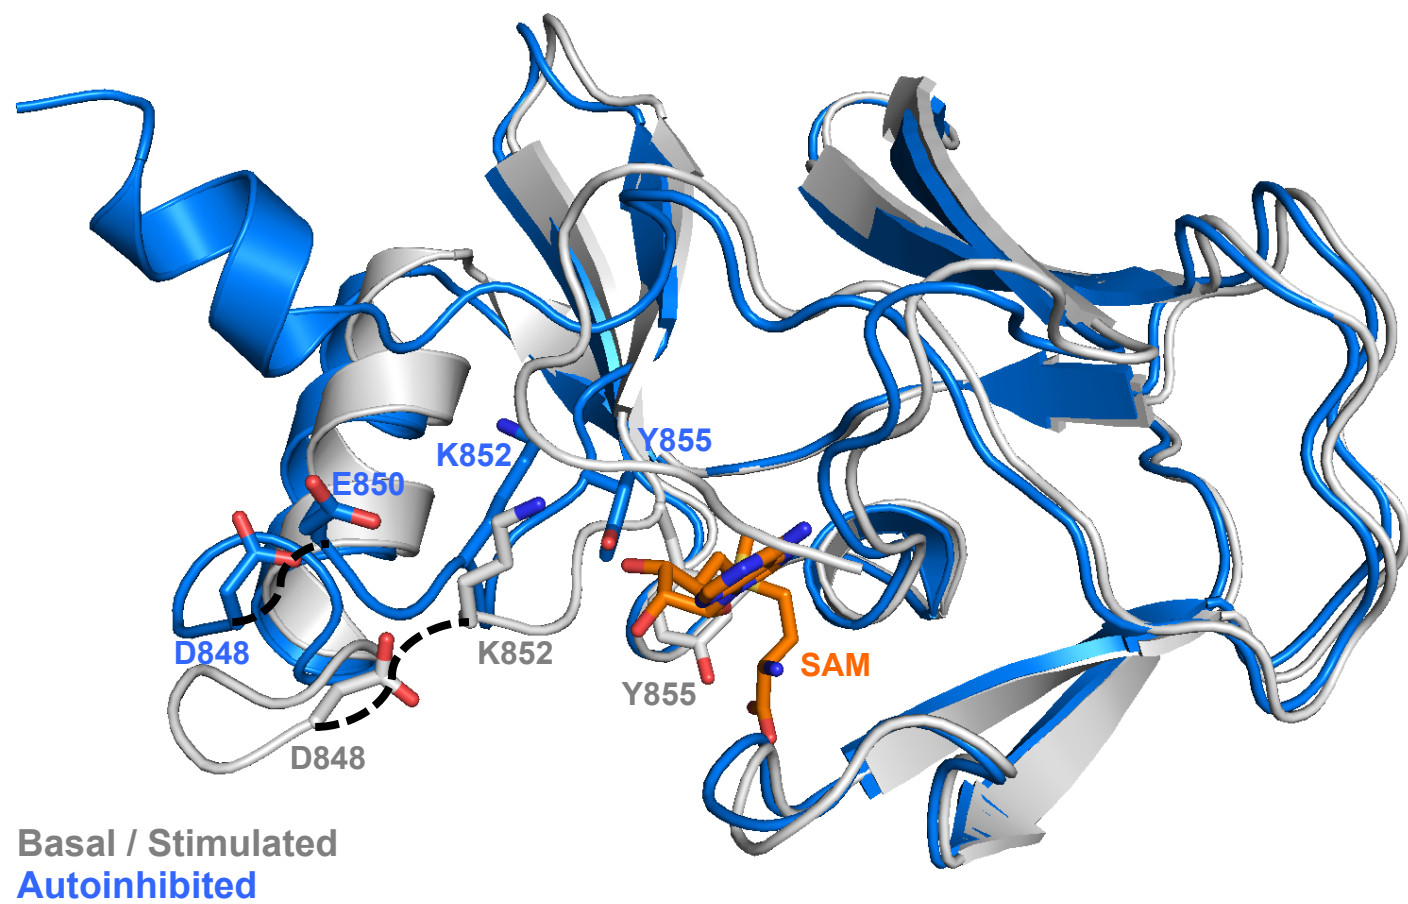

Fig. S4

Bratkowski et al.

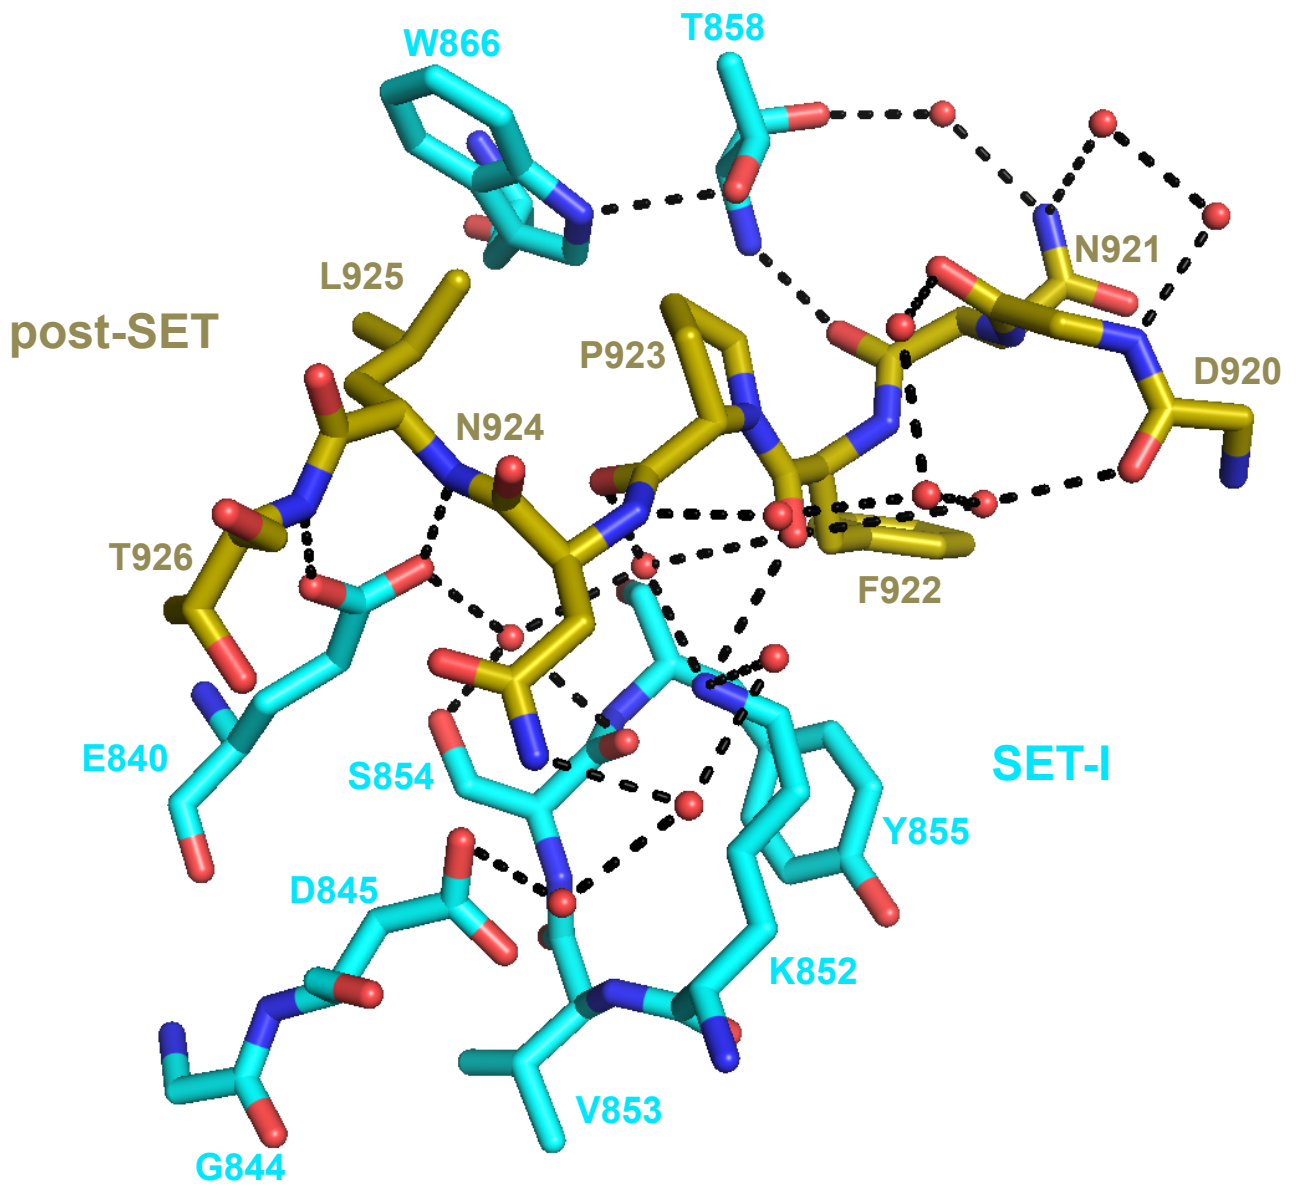

Fig. S5

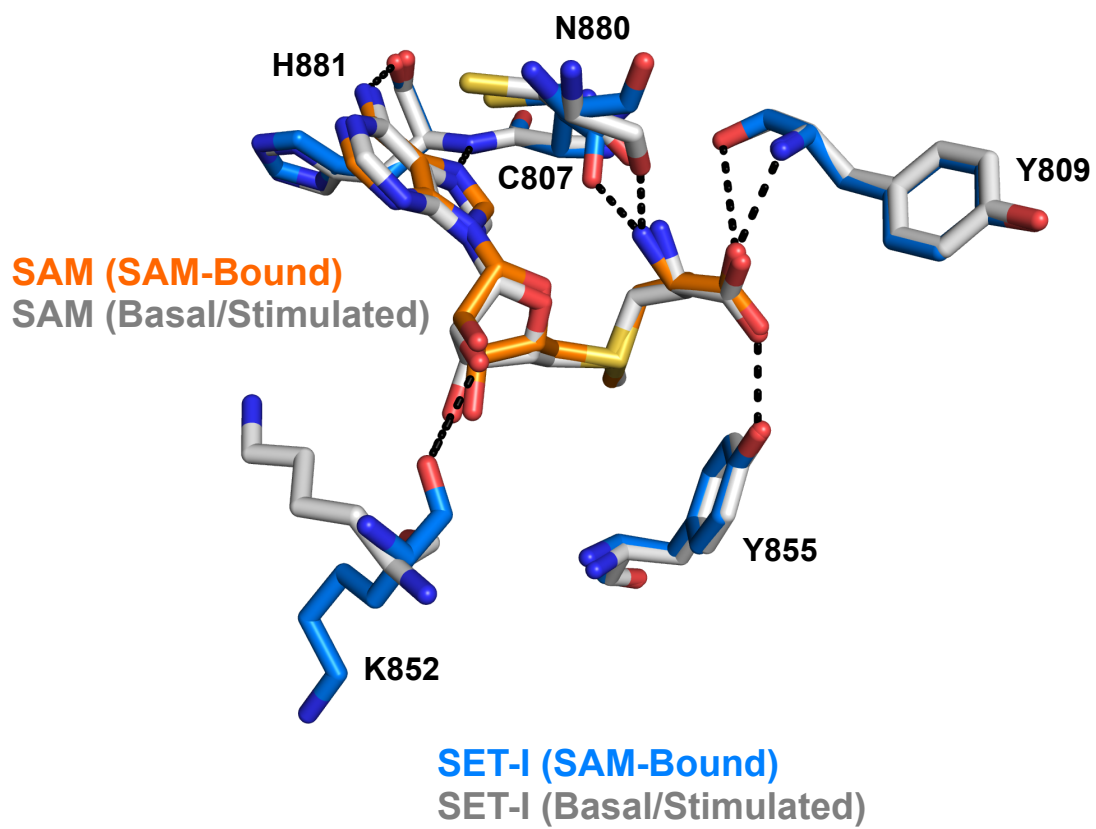

Fig. S6

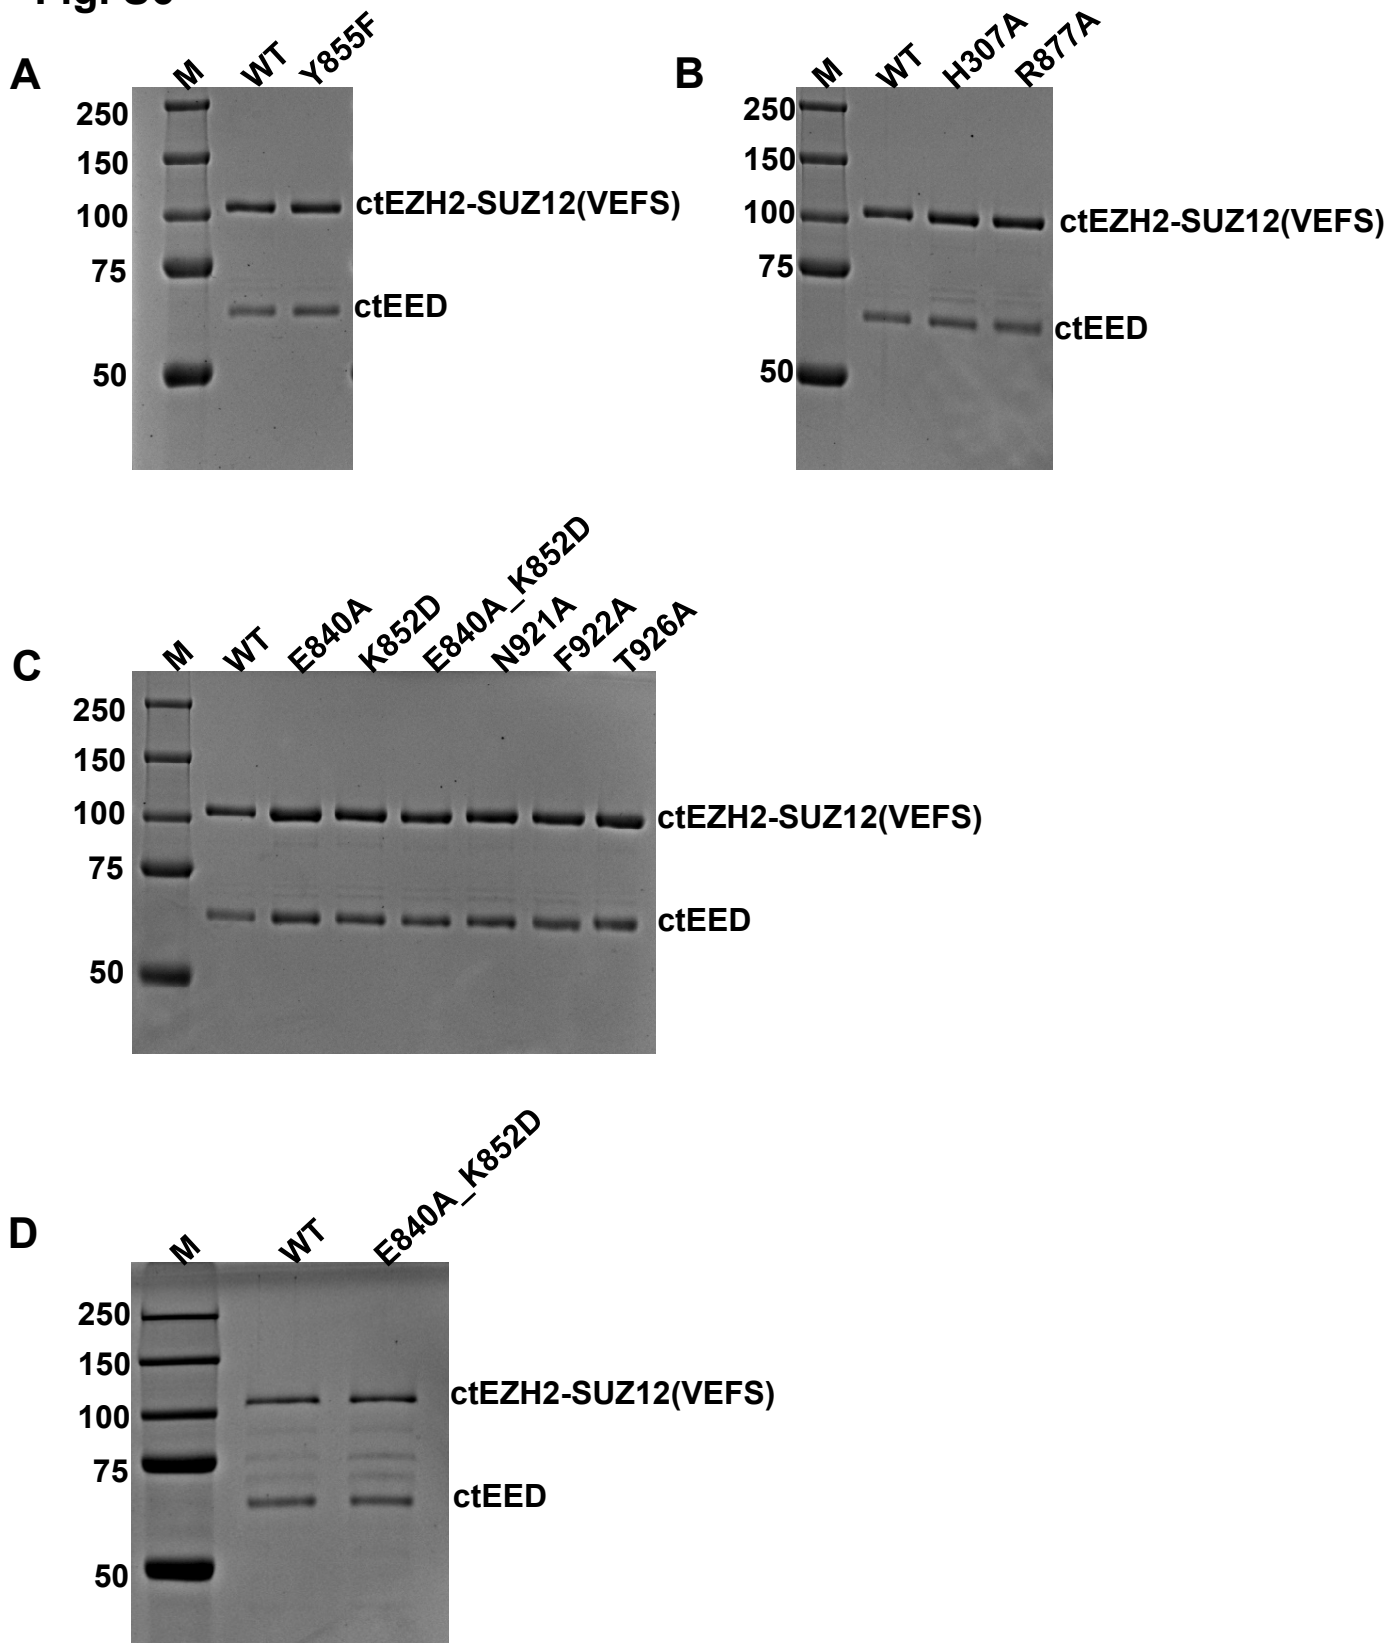



Fig. S7

Wildtype

*Bratkowski et al.*

post-SET

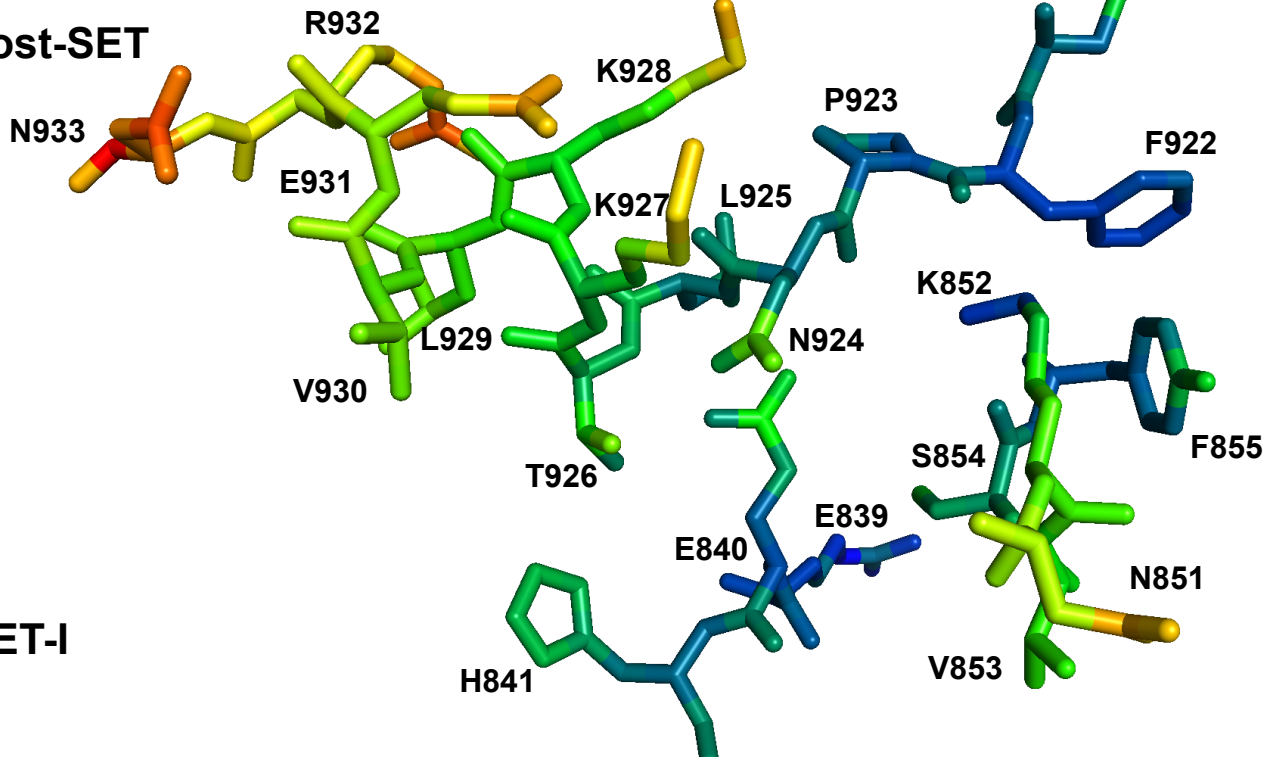

SET-I

E840A/K852D

post-SET

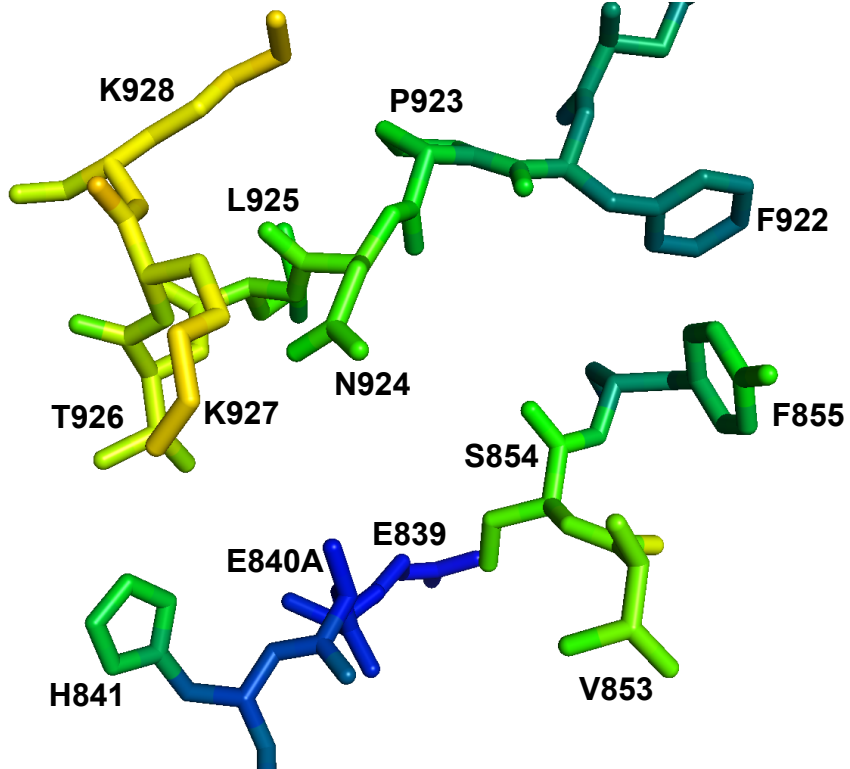

SET-I

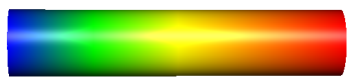

B-factor ( $\text{\AA}^2$ )

23

133

A

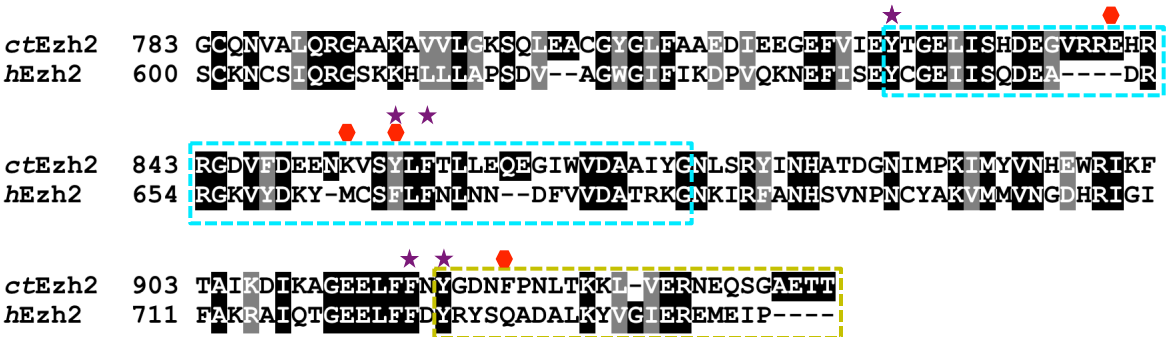

Fig. S9

A

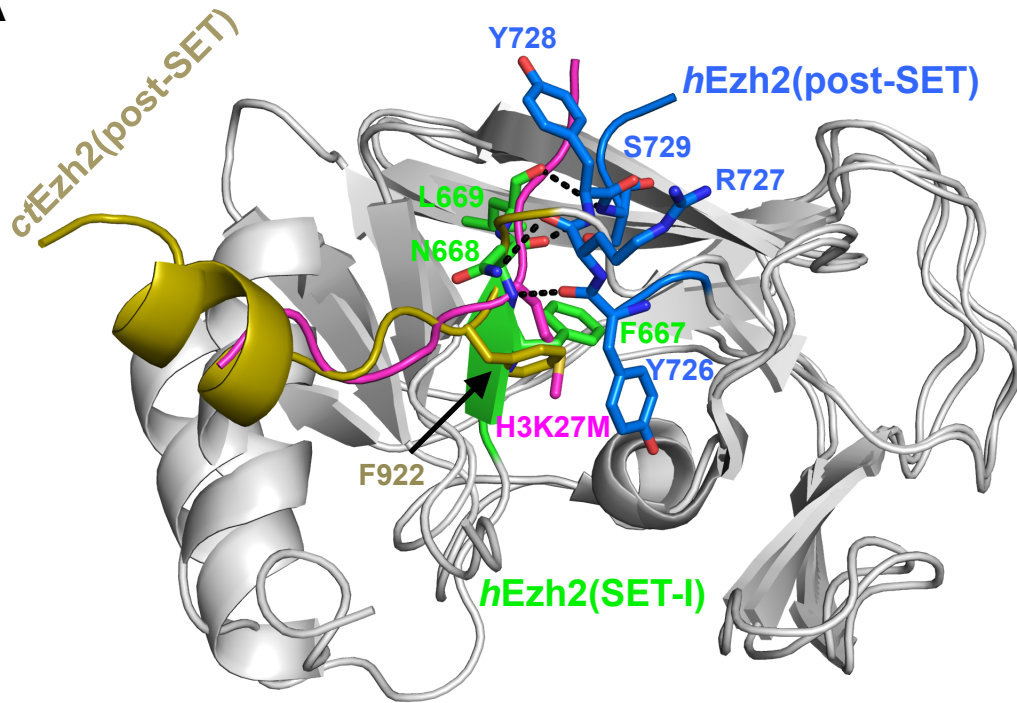

B

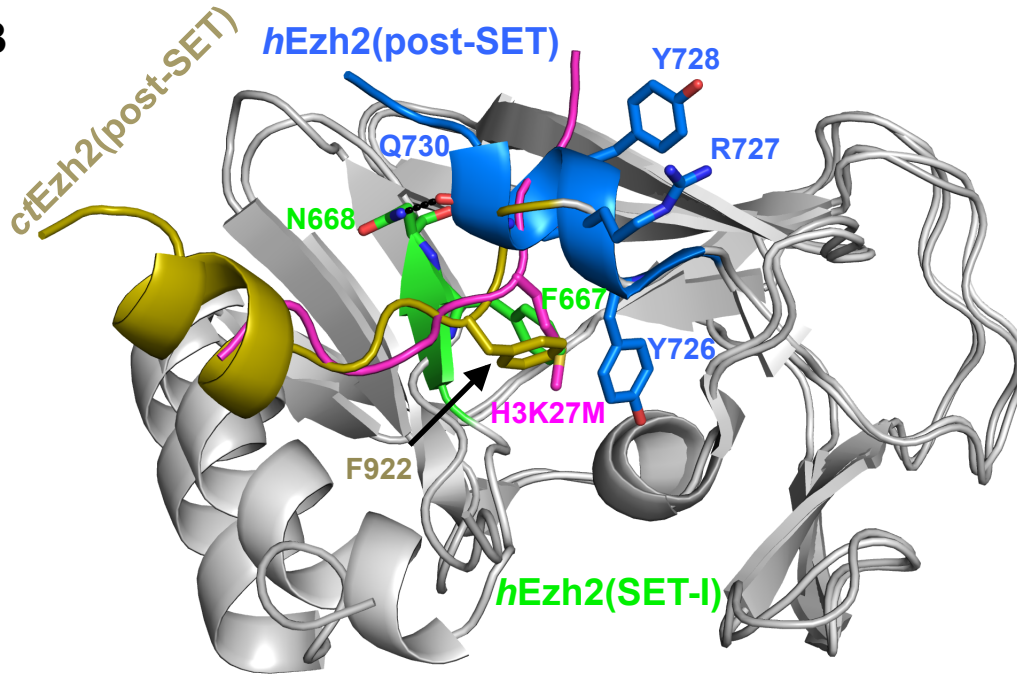

**Table 1 Data collection and refinement statistics (molecular replacement)**

| Crystal                                             | ctPRC2 WT Apo              | ctPRC2 SAM                 | ctPRC2 E840/K852 Apo                 |
|-----------------------------------------------------|----------------------------|----------------------------|--------------------------------------|
| <b>Data collection<sup>a</sup></b>                  |                            |                            |                                      |
| Space group                                         | C222 <sub>1</sub>          | C222 <sub>1</sub>          | C222 <sub>1</sub>                    |
| Cell dimensions                                     |                            |                            |                                      |
| <i>a</i> , <i>b</i> , <i>c</i> (Å)                  | 117.78, 137.90, 223.85     | 117.45, 138.01, 223.063    | 117.59, 138.00, 224.37               |
| $\alpha$ , $\beta$ , $\gamma$ (°)                   | 90, 90, 90                 | 90, 90, 90                 | 90, 90, 90                           |
| Resolution (Å)                                      | 50 – 2.19 (2.25 – 2.19)    | 50 – 2.57 (2.64 – 2.57)    | 50 – 2.12 (2.16 – 2.11) <sup>b</sup> |
| <i>R</i> <sub>merge</sub>                           | 0.126 (1.54)               | 0.162 (1.40)               | 0.237 (3.86)                         |
| <i>R</i> <sub>pim</sub>                             | 0.052 (0.66)               | 0.057 (0.49)               | 0.067 (1.09)                         |
| <i>I</i> / $\sigma$ <i>I</i>                        | 14.91 (1.33)               | 12.79 (1.63)               | 23.13 (1.59)                         |
| <i>CC</i> <sub>1/2</sub>                            | 0.81 (0.42)                | 0.89 (0.55)                | 0.88 (0.465)                         |
| Completeness (%)                                    | 99.9 (99.8)                | 99.6 (99.6)                | 100 (100)                            |
| Redundancy                                          | 6.7 (6.2)                  | 8.9 (9.0)                  | 13.2 (13.4)                          |
| <b>Refinement</b>                                   |                            |                            |                                      |
| Resolution (Å)                                      | 43.45 – 2.19 (2.25 – 2.18) | 47.32 – 2.57 (2.64 – 2.57) | 44.75 – 2.11 (2.16 – 2.11)           |
| No. reflections                                     | 89879                      | 55206                      | 98691                                |
| <i>R</i> <sub>work</sub> / <i>R</i> <sub>free</sub> | 0.173/0.224                | 0.174/0.232                | 0.168/0.214                          |
| No. atoms                                           | 10825                      | 10500                      | 10991                                |
| Protein                                             | 10028                      | 10221                      | 10083                                |
| Ligand/ion                                          | 8                          | 35                         | 8                                    |
| Water                                               | 789                        | 244                        | 900                                  |
| Ave. <i>B</i> -factors (Å <sup>2</sup> )            |                            |                            |                                      |
| Protein                                             | 45.31                      | 53.05                      | 37.22                                |
| Ligand/ion                                          | 39.12                      | 46.03                      | 29.23                                |
| Water                                               | 46.08                      | 45.65                      | 39.57                                |
| R.m.s. deviations                                   |                            |                            |                                      |
| Bond lengths (Å)                                    | 0.009                      | 0.009                      | 0.008                                |
| Bond angles (°)                                     | 0.884                      | 0.990                      | 0.845                                |
| Ramachandran Plot                                   |                            |                            |                                      |
| Favored (%)                                         | 96.60                      | 95.54                      | 95.80                                |
| Allowed (%)                                         | 3.23                       | 3.98                       | 3.96                                 |
| Outlier (%)                                         | 0.16                       | 0.48                       | 0.24                                 |

<sup>a</sup>Data were collected from a single crystal. <sup>b</sup>Values in parentheses are for highest-resolution shell.
